# Supplementary material for: Prevalence of insufficient weight loss 5 years after Roux-en-Y gastric bypass: metabolic consequences and prediction estimates: a prospective registry study
Source: PubMed Central journal article supplement (PMC7929824; doi:10.1136/bmjopen-2020-046407), 2021-03-02
Supplement: bmjopen-2020-046407supp001.pdf [file bmjopen-2020-046407supp001.pdf]

## Online-only Supplements

**eAppendix 1.** Cut-offs used to define cardiometabolic disease

**eAppendix 2.** Sensitivity analysis

**eAppendix 3.** Examples of risk calculation

**eFigure 1 a-g.** Unadjusted mean participants with pharmacological treatment of dyslipidemia and/or type 2 diabetes or hypertension at baseline, stratified on surgical treatment failure

**eFigure 2 a-g.** Unadjusted mean participants without pharmacological treatment of dyslipidemia and/or type 2 diabetes or hypertension at baseline, stratified on surgical treatment failure

**eFigure 3.a-c.** Predicted probability of type 2 diabetes at year five after surgery plotted over a, percentage weight loss from baseline to year five, b, excess body mass index loss from baseline to year five, c, body mass index at year five

**eFigure 4.a-c.** Predicted probability of dyslipidemia at year five after surgery plotted over a, percentage weight loss from baseline to year five, b, excess body mass index loss from baseline to year five, c, body mass index at year five.

**eFigure 5.a-c.** Predicted probability of Hypertension at year five after surgery plotted over a, percentage weight loss from baseline to year five, b, excess body mass index loss from baseline to year five, c, body mass index at year five.

**eTable 1.** Modality of the one-, two-, and five year follow-ups

**eTable 2.** Comparison of baseline characteristics between included participants and those lost to follow-up at year five

**eTable 3.** Percentage of available data on pharmacological treatment, biochemistry and blood pressure.

**eTable 4.** Comparison of baseline characteristics between surgical treatment failure and non-surgical treatment failure

**eTable 5.** Odds of cardiometabolic disease at year five, separate models for each definitions of surgical treatment failure

**eTable 6.** Odds of Cardiometabolic disease at year five for subjects reaching one, two or three of the three definitions

**eAppendix 1. Cut-offs used to define cardiometabolic disease**

LDL >3.0mmol/L

HDL <1.0mmol/L for males and <1.3mmol/L for females

Triglycerides >2.0mmol/L

Fasting glucose >7.0mmol/L

HbA1c >48mmol/mol

Systolic- >140mmHg or Diastolic blood pressure >90mmHg

Conversion to mg/dL is done by a multiplying factor of 38.67 for LDL and HDL, 88.57 for TG, 18 for fasting glucose and using the formula  $(0.09148 * IFCC) + 2.152$  for HbA1c(%).

## eAppendix 2. Sensitivity analysis

We compared participants lost to follow-up with those not lost and found that the former had a higher prevalence of surgical treatment failure at year one (12.3% vs. 10.3%,  $p=0.015$ ) and a similar prevalence (13.3% vs. 11.6%) at year two ( $p=0.081$ ). Within the sample, there was a strong carryover effect, as 73.5% who met the definition of surgical treatment failure in year one and 79.5% in year two also met the definition at year five.

Additionally, participants who visited the clinic for follow-up had a higher prevalence of surgical treatment failure (26.7%) compared with other modes of follow-up (20.2%,  $p<0.001$ ).

No statistical differences in prevalence of surgical treatment failure at year five were evident between retention groups 60-70%, 70-80% and >80%, (23.8% vs. 23.4% vs. 21.4%) ( $p=0.235$ ). We found no statistical difference according to the year of surgery ( $p=0.280$ ), or surgical volume (<50 [23.7%] vs.  $\geq 50$  [23.0%] LRYGB per year,  $p=0.695$ ).

There was a crude difference in the prevalence of surgical treatment failure between males and females (males 31.6% vs. females 20.9%,  $p<0.001$ ): OR=1.46 (95%CI 1.26-1.69) after baseline adjustments for age, BMI, T2D, hypertension and dyslipidemia. Males experienced a lower %TWL from baseline to all follow-up periods (data not shown).

At baseline, T2D (25.1% vs. 12.4%) and hypertension (44.4% vs. 24.1%) were more common among males (both  $p<0.001$ ), whereas dyslipidemia was more common among females (61.7% vs. 56.9%,  $p=0.002$ ).

We also found an association between those who had cardiometabolic disease present at baseline and surgical treatment failure at year five. The presence of T2D at baseline was associated with surgical treatment failure (OR=1.70; 95%CI 1.44-2.00), as was dyslipidemia at baseline (OR=1.30; 95%CI 1.15-1.48) and hypertension at baseline (OR=1.16; 95%CI 1.01-1.34), all adjusted for sex, age and BMI.

In terms of the magnitude of prediction factors, four additional models were assessed, one omitting change in weight between year one and two (AUC = 0.8260); another omitting %TWL at year one (AUC = 0.7214). Third, we assessed a model adding cardiometabolic disease (T2D, dyslipidemia, hypertension) at baseline as additional predictors. With this latter model, we found that only dyslipidemia remained significant and improved the model minimally (AUC = 0.8749). We also assessed a model restricted to variables available at baseline that included sex, age, BMI and cardiometabolic disease (AUC = 0.638).

**eAppendix 3. Examples of calculation of predicted probability meeting one of the definitions of surgical treatment failure at year five.**

Fictitious example 1: male=0, age 43 years, BMI = 45, -23%TWL during year one, +4 kg between year one and two

$$a = -1.1 + -0.00545*0 + 0.00299*43 + 0.14949*45 + 0.22310*-23 + 0.15982*4$$
$$\exp(a)/(1+\exp(a)) = 0.78$$

Hence, predicted probability of surgical treatment failure at year five is 78%.

Fictitious example 2: male=0, age 43 years, BMI = 49, -33%TWL during year one, -1 kg between year one and two,

$$a = -1.1 + -0.00545*0 + 0.00299*43 + 0.14949*49 + 0.22310*-33 + 0.15982*-1$$

This yields a predicted probability of 23.8% for surgical treatment failure at year five.

**eFigure 1 a-g. Unadjusted mean values (bars) with error bars (95% confidence intervals) for participants with pharmacological treatment of dyslipidemia and/or type 2 diabetes or hypertension at baseline, stratified on surgical treatment failure. a) low density lipoprotein, b) high density lipoprotein, c) triglycerides, d) fasting glucose, e) HbA1c, f) systolic blood pressure, g) diastolic blood pressure. Tables below figures show number available at each timepoint and prevalence above cut-off. Bold font with \* indicates a difference  $p < 0.05$ .**

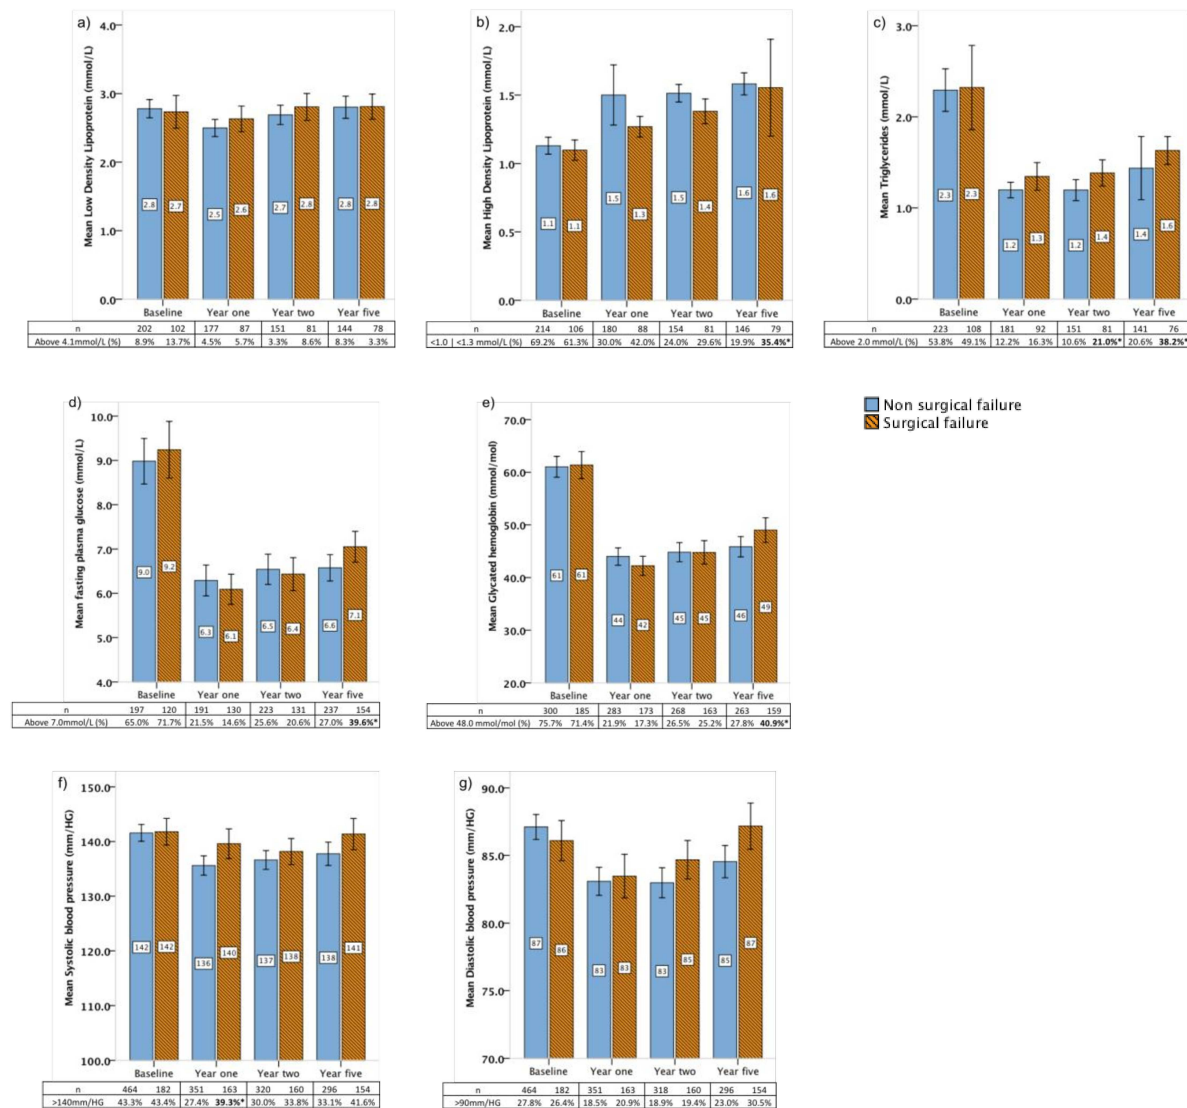

**eFigure 2 a-g. Unadjusted mean values (bars) with error bars (95% confidence intervals) for participants without pharmacological treatment of dyslipidemia and/or type 2 diabetes or hypertension at baseline, stratified on surgical treatment failure. a) low density lipoprotein, b) high density lipoprotein, c) triglycerides, d) fasting glucose, e) HbA1c, f) systolic blood pressure, g) diastolic blood pressure. Tables below figures show number available at each timepoint and prevalence above cut-off. Bold font with \* indicates a difference (p<0.05).**

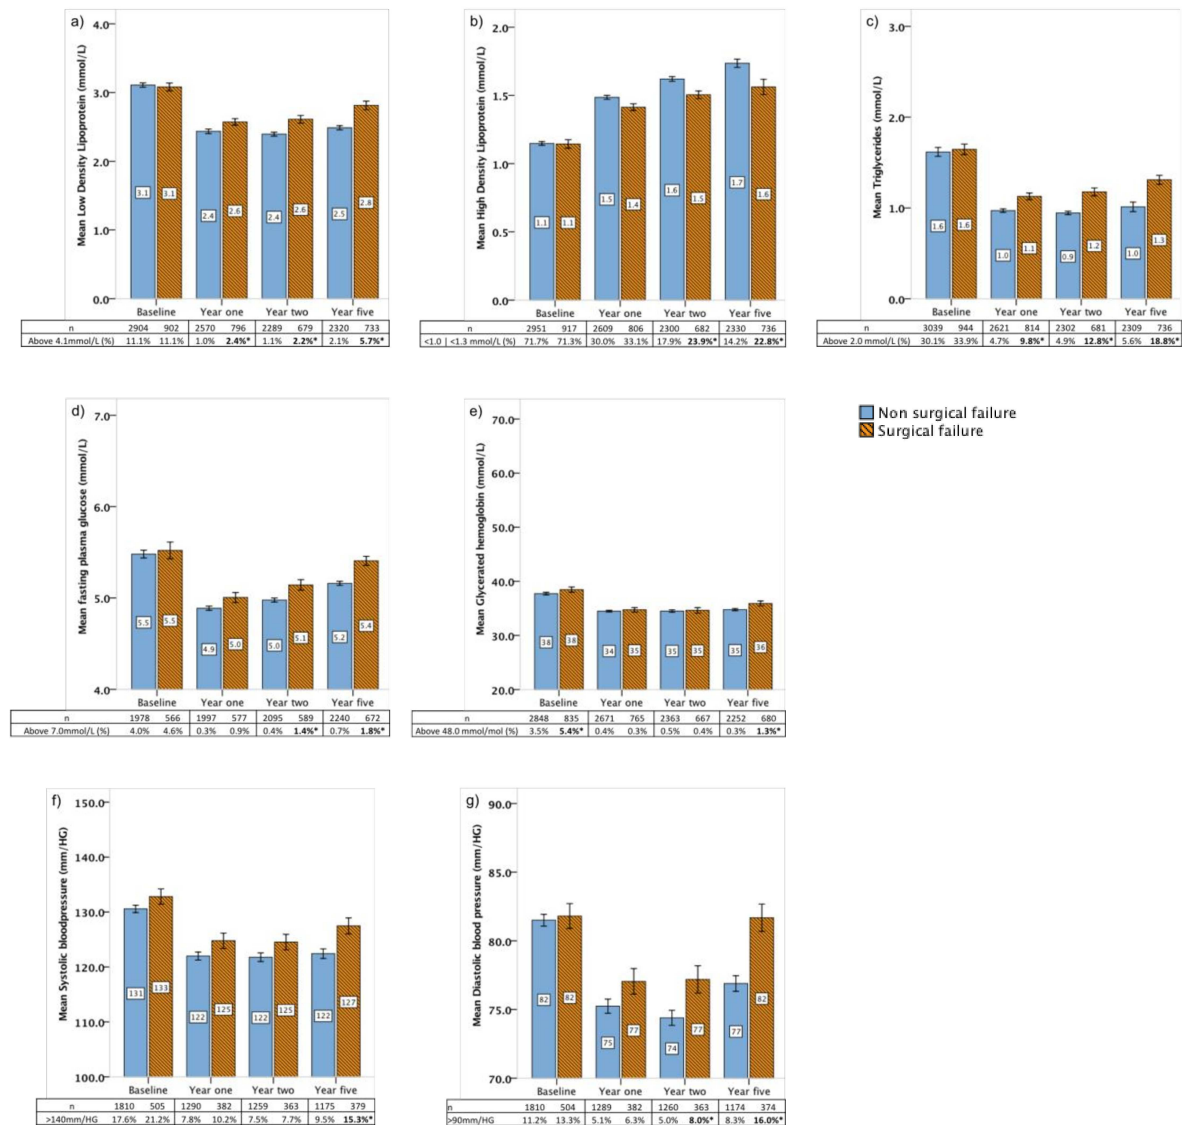

**eFigure 3.a-c. Predicted probability of type 2 diabetes at year five after surgery plotted over a, percentage weight loss from baseline to year five, b, excess body mass index loss from baseline to year five, c, body mass index at year five. Groups based on presence on presence of type 2 diabetes at baseline. Adjusted for age, sex, body mass index and type 2 diabetes at baseline.**

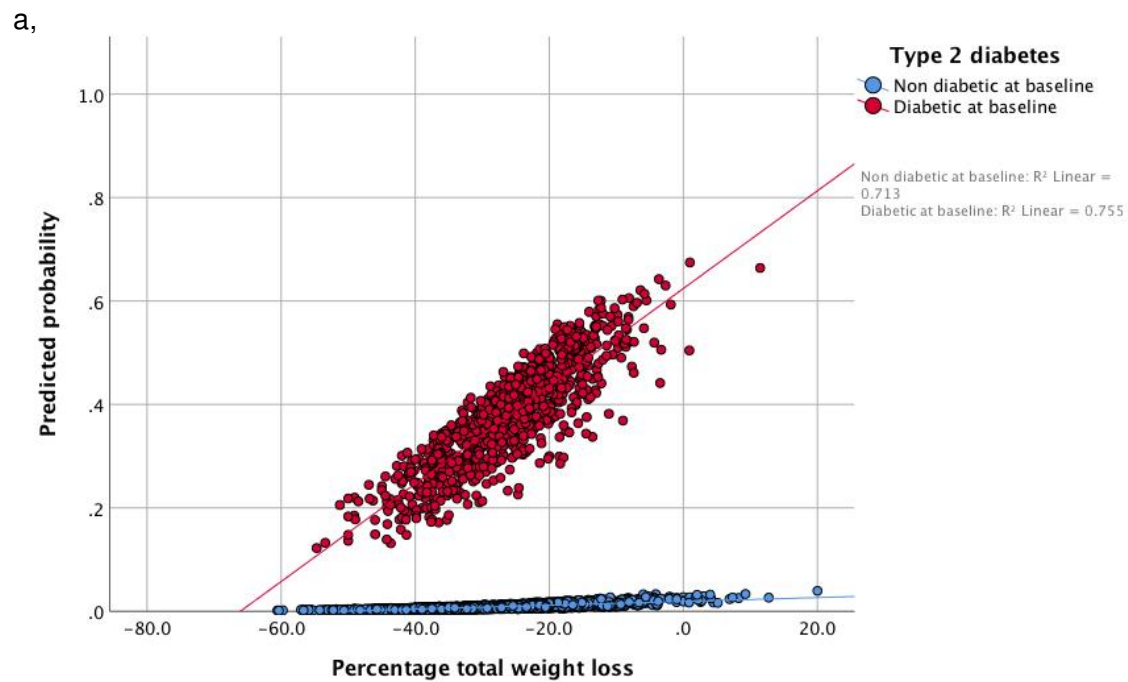

b,

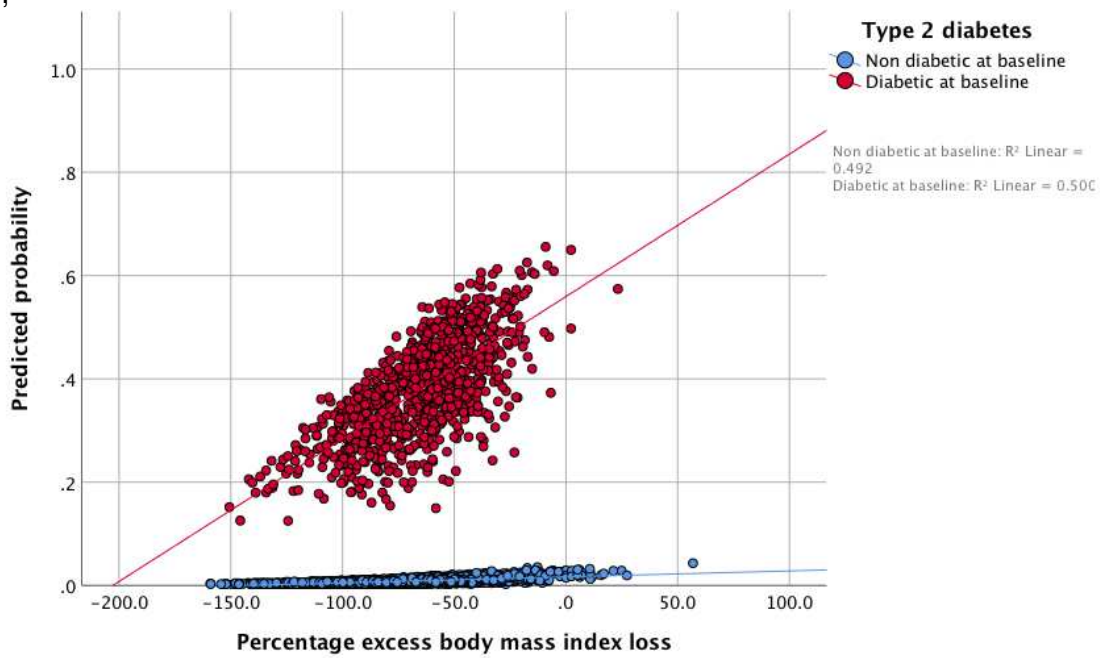

c,

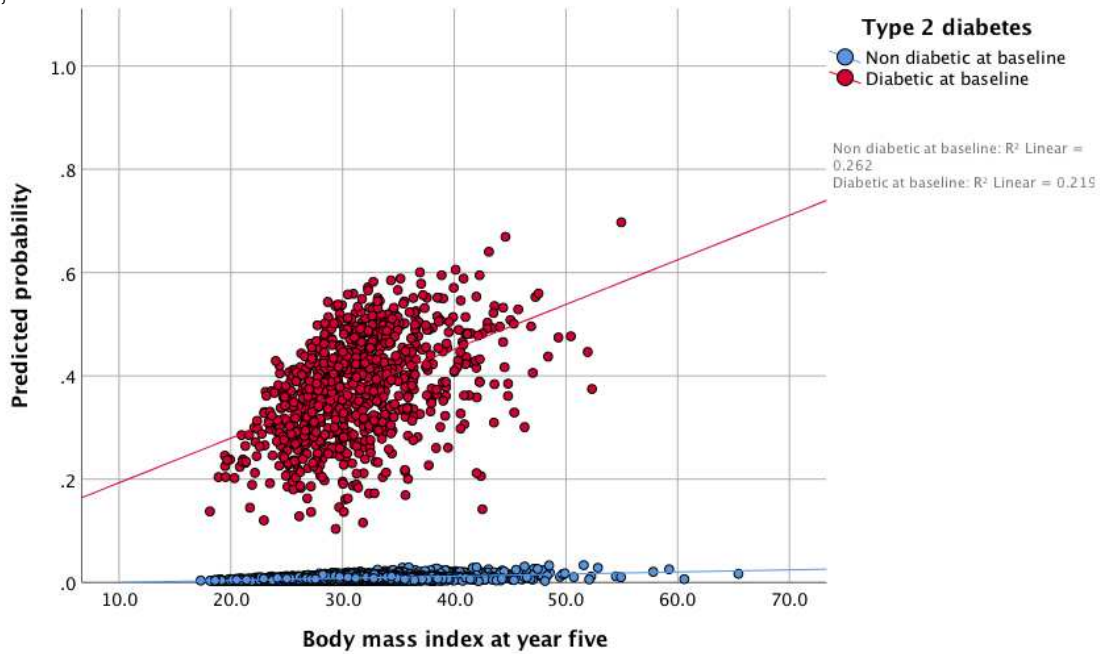



**eFigure 4.a-c .Predicted probability of dyslipidemia at year five after surgery plotted over a, percentage weight loss from baseline to year five, b, excess body mass index loss from baseline to year five, c, body mass index at year five. Groups based on presence of dyslipidemia at baseline. Adjusted for age, sex, baseline body mass index and dyslipidemia at baseline.**

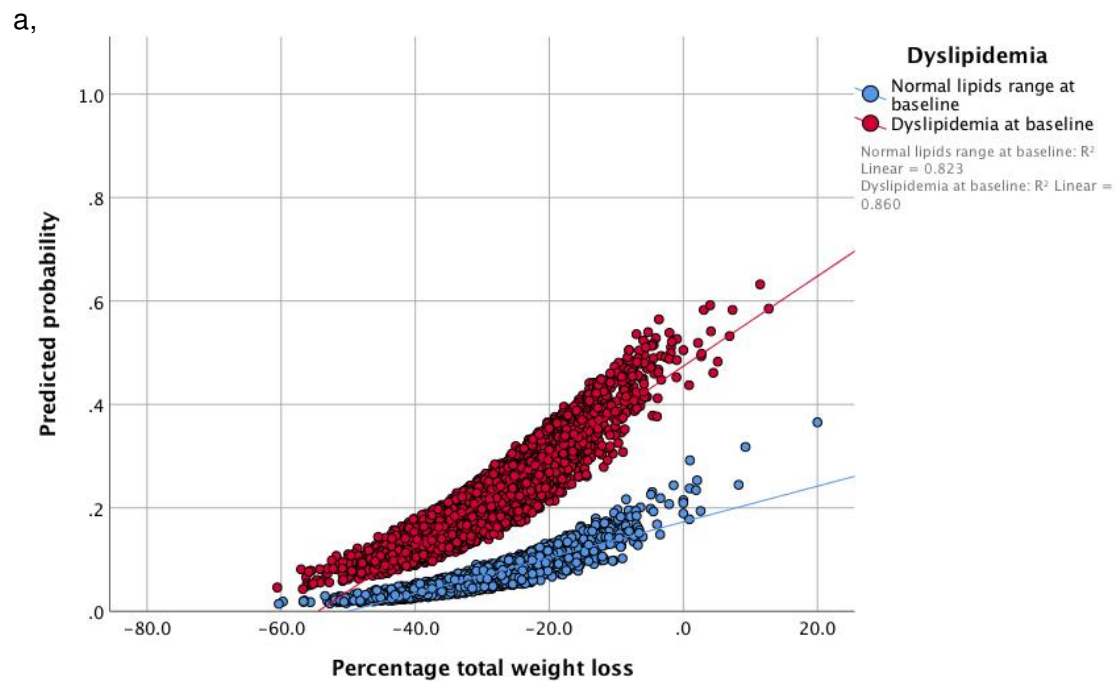

b,

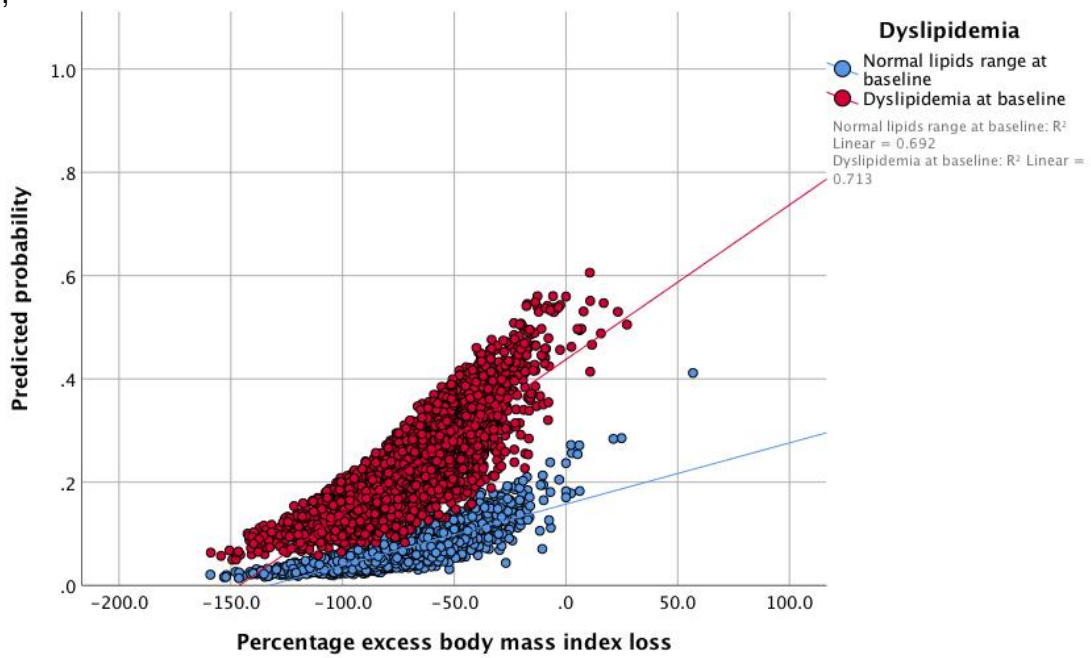

c,

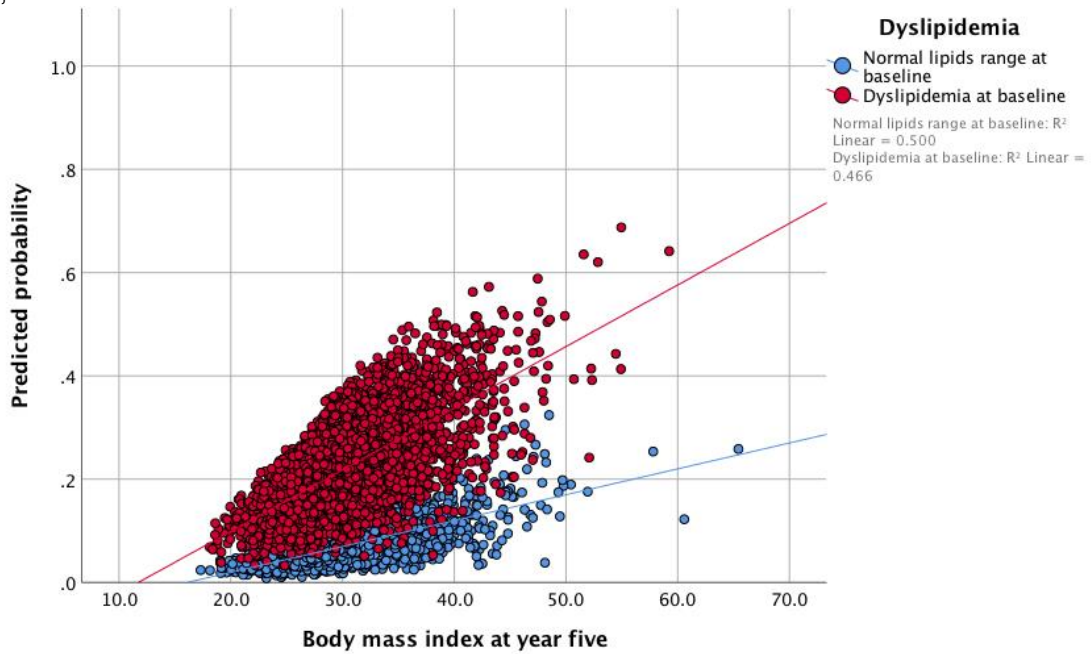

**eFigure 5.a-c. Predicted probability of Hypertension at year five after surgery plotted over a, percentage weight loss from baseline to year five, b, excess body mass index loss from baseline to year five, c, body mass index at year five. Groups based on presence of hypertension at baseline. Adjusted for age, sex, body mass index and hypertension at baseline.**

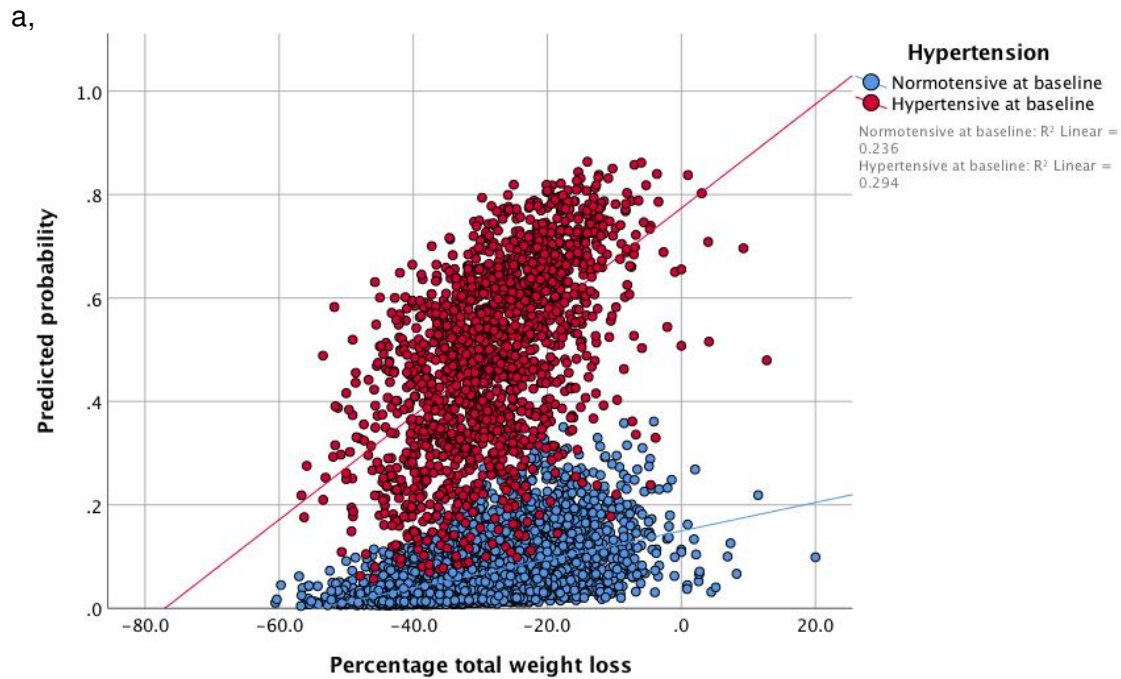

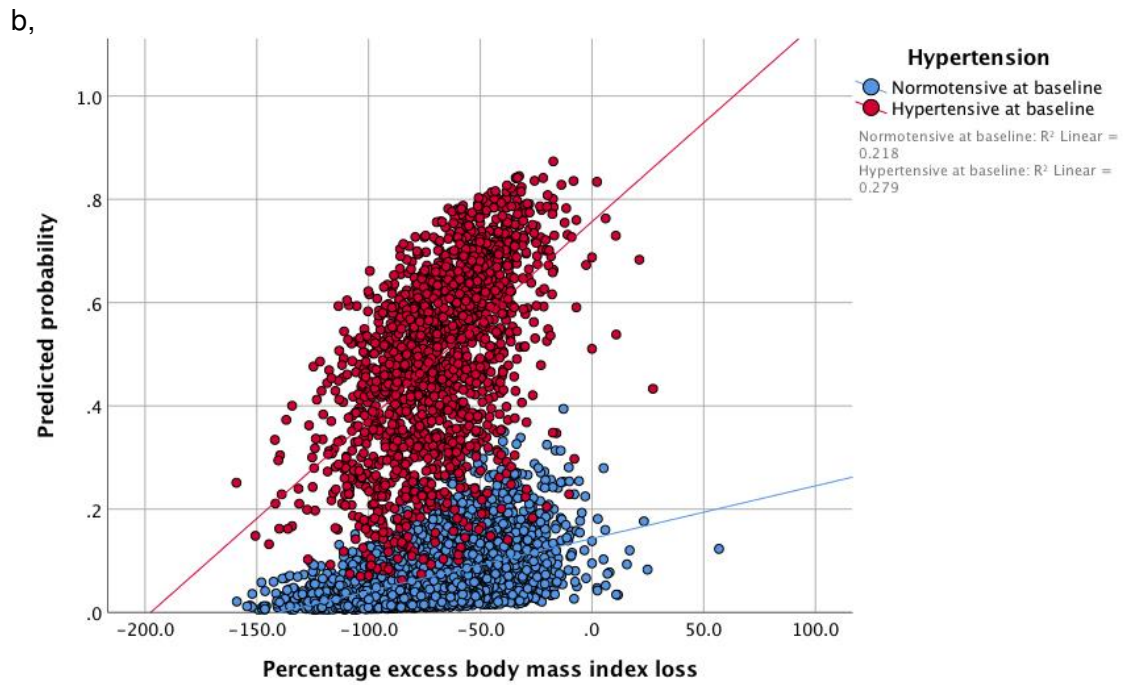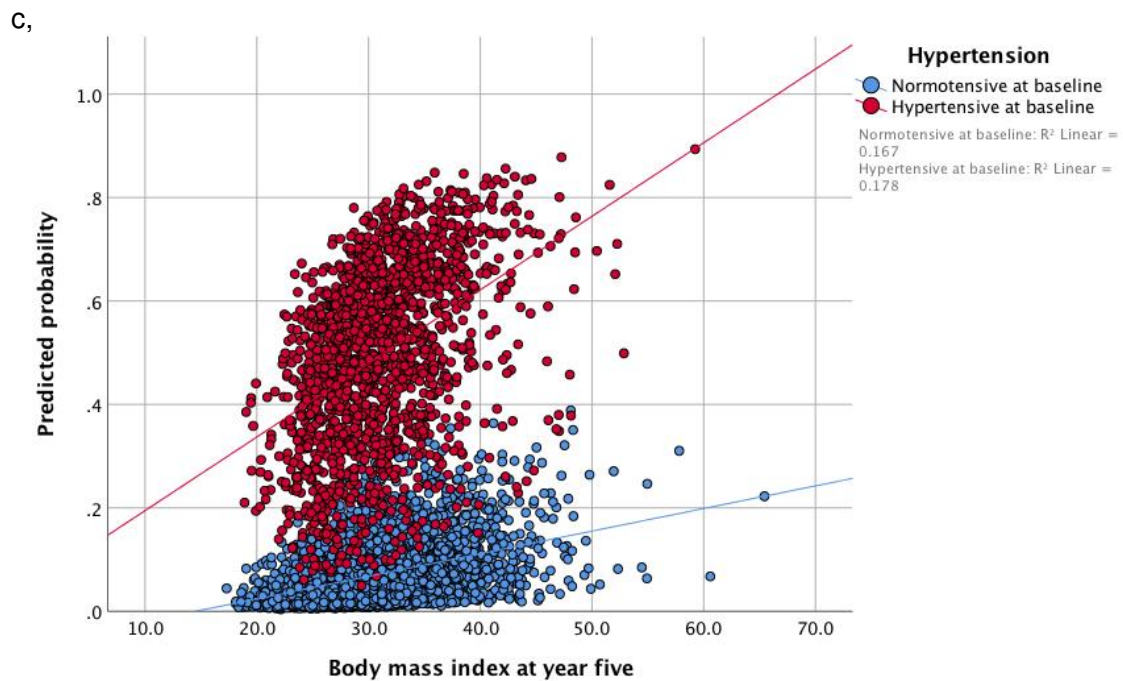

**eTable 1.** Modality of the one-, two-, and five year follow-ups

|                        | <b>Year one</b> | <b>Year two</b> | <b>Year five</b> |
|------------------------|-----------------|-----------------|------------------|
|                        | n (%)           | n (%)           | n (%)            |
| Clinical visit         | 4636 (78.1)     | 3543 (60.0)     | 2651 (44.7)      |
| Telephone consultation | 729 (12.3)      | 1172 (19.7)     | 2170 (36.6)      |
| E-mail/letter          | 217 (3.7%)      | 458 (7.7)       | 1087 (18.3)      |
| Unspecified            | 14 (0.2)        | 23 (0.4)        | 28 (0.5)         |
| Missing                | 340 (5.7)       | 740 (12.5)      | 0 (0.0)          |

**eTable 2. Comparison of baseline characteristics between included participants and those lost to follow-up at year five**

|                                        | <u>Included</u> |              | <u>Lost to follow-up</u> |              | P       |
|----------------------------------------|-----------------|--------------|--------------------------|--------------|---------|
|                                        | n               | mean (sd)    | n                        | mean (sd)    |         |
| Age at surgery                         | 5936            | 39.4 (9.0)   | 2375                     | 37.6 (9.1)   | <0.0001 |
| Sex, % female                          | 5936            | 79.10%       | 2375                     | 73.6%        | <0.0001 |
| Height, cm                             | 5936            | 168.8 (8.9)  | 2375                     | 169.8 (9.3)  | <0.0001 |
| Weight, kg                             | 5936            | 122.8 (20.0) | 2375                     | 126.3 (20.7) | <0.0001 |
| BMI at surgery, kg/m <sup>2</sup>      | 5936            | 42.9 (5.1)   | 2375                     | 43.6 (5.2)   | <0.0001 |
| Glucose, mmol/l                        | 2861            | 5.9 (1.9)    | 1312                     | 5.8 (1.8)    | 0.223   |
| HbA1c, mmol/mol                        | 4168            | 40.6 (11.4)  | 1846                     | 40.8 (11.7)  | 0.528   |
| Pharmacological diabetes treatment     | 5936            | 11.4%        | 2375                     | 9.6%         | 0.022   |
| Diabetes type 2 <sup>A</sup>           | 5936            | 15.1%        | 2375                     | 14.6%        | 0.543   |
| High-density lipoprotein, mmol/l       | 4188            | 1.2 (0.4)    | 1845                     | 1.1 (0.5)    | 0.017   |
| Low-density lipoprotein, mmol/l        | 4110            | 3.1 (0.9)    | 1798                     | 3.1 (1.0)    | 0.756   |
| Triglycerides, mmol/l                  | 4314            | 1.7 (1.4)    | 1883                     | 1.8 (2.2)    | 0.087   |
| Pharmacological dyslipidemia treatment | 5936            | 7%           | 2375                     | 6.5%         | 0.465   |
| Dyslipidemia <sup>B</sup>              | 5936            | 67.5%        | 2375                     | 74.1%        | <0.0001 |
| Systolic BP, mmHg                      | 2960            | 133 (16)     | 1348                     | 135 (17)     | 0.015   |
| Diastolic BP, mmHg                     | 2960            | 83 (10)      | 1347                     | 83 (10)      | 0.164   |
| Pharmacological hypertension treatment | 5936            | 19.5%        | 2375                     | 18.1%        | 0.142   |
| Hypertension <sup>C</sup>              | 5936            | 28.4%        | 2375                     | 29.3%        | 0.365   |

BMI – Body mass index

<sup>A</sup> Pharmacologically treated T2D | fasting glucose >7.0mmol/l | HbA1c >48mmol/mol

<sup>B</sup> Pharmacologically treated dyslipidemia | LDL >4.1 | TG > 2.0 | HDL <1.0mmol/L for males and <1.3mmol/L for females

<sup>C</sup> Pharmacologically treated blood pressure | systolic- >140mm/Hg or diastolic blood pressure >90mm/Hg

**eTable 3. Percentage of the 5936 participants with available data on pharmacological treatment and on biochemistry and blood pressure at baseline, one, two and five years after surgery.**

|                           | Baseline | Year one | Year two | Year five |
|---------------------------|----------|----------|----------|-----------|
| Pharmacological treatment |          |          |          |           |
| Type 2 diabetes           | 100%     | 94%      | 88%      | 100%      |
| Dyslipidemia              | 100%     | 94%      | 88%      | 100%      |
| Hypertension              | 100%     | 94%      | 88%      | 100%      |
|                           |          |          |          |           |
| Biochemistry              |          |          |          |           |
| Low-density lipoprotein   | 69%      | 61%      | 54%      | 55%       |
| High-density lipoprotein  | 71%      | 62%      | 54%      | 55%       |
| Triglycerides             | 73%      | 63%      | 54%      | 55%       |
| Fasting glucose           | 48%      | 49%      | 51%      | 56%       |
| HbA1c                     | 70%      | 66%      | 58%      | 57%       |
| Blood pressure            | 50%      | 37%      | 35%      | 34%       |

**eTable 4. Comparison of baseline characteristics between surgical treatment failure (STF) and non-STF**

|                                        | STF  |              | Non-STF |              | P      |
|----------------------------------------|------|--------------|---------|--------------|--------|
|                                        | n    | mean (sd)    | n       | mean (sd)    |        |
| Age at surgery                         | 1371 | 40.5 (8.8)   | 4565    | 39.1 (9.0)   | <0.001 |
| Sex, % female                          | 1371 | 71.4%        | 4565    | 81.4%        | <0.001 |
| Height, cm                             | 1371 | 169.6 (9.4)  | 4565    | 168.6 (8.7)  | <0.001 |
| Weight, kg                             | 1371 | 128.2 (22.9) | 4565    | 121.2 (18.7) | <0.001 |
| BMI at surgery, kg/m <sup>2</sup>      | 1371 | 44.4 (6.1)   | 4565    | 42.5 (4.6)   | <0.001 |
| <b>Glucose Metabolism</b>              |      |              |         |              |        |
| Glucose, mmol/l                        | 686  | 6.2 (2.3)    | 2175    | 5.8 (1.8)    | <0.001 |
| HbA1c, mmol/mol                        | 1020 | 42.6 (13.3)  | 3148    | 40.0 (10.7)  | <0.001 |
| Pharmacological Diabetes treatment     | 1371 | 17.4%        | 4565    | 9.6%         | <0.001 |
| Diabetes type 2 <sup>A</sup>           | 1371 | 22.0%        | 4565    | 13.0%        | <0.001 |
| <b>Lipids</b>                          |      |              |         |              |        |
| High-density lipoprotein, mmol/l       | 1023 | 1.1 (0.5)    | 3165    | 1.2 (0.4)    | 0.605  |
| Low-density lipoprotein, mmol/l        | 1004 | 3.1 (0.9)    | 3106    | 3.1 (0.9)    | 0.201  |
| Triglycerides, mmol/l                  | 1052 | 1.7 (1.2)    | 3262    | 1.7 (1.4)    | 0.285  |
| Pharmacological dyslipidemia treatment | 1371 | 9.6%         | 4565    | 6.2%         | <0.001 |
| Dyslipidemia <sup>B</sup>              | 1371 | 72.3%        | 4565    | 66.0%        | <0.001 |
| <b>Physiology</b>                      |      |              |         |              |        |
| Systolic BP, mmHg                      | 687  | 135 (16)     | 2274    | 133 (16)     | 0.001  |
| Diastolic BP, mmHg                     | 686  | 83 (11)      | 2274    | 83 (10)      | 0.509  |
| Pharmacological hypertension treatment | 1371 | 24.8%        | 4565    | 17.9%        | <0.001 |
| Hypertension <sup>C</sup>              | 1371 | 34.2%        | 4565    | 26.6%        | <0.001 |

<sup>A</sup> Pharmacologically treated T2D | fasting glucose >7.0mmol/l | HbA1c >48mmol/mol<sup>B</sup> Pharmacologically treated dyslipidemia | LDL >4.1 | TG > 2.0 | HDL <1.0mmol/L for males and <1.3mmol/L for females<sup>C</sup> Pharmacologically treated blood pressure | systolic- >140mm/Hg or diastolic blood pressure >90mm/Hg



**eTable 5. Odds of cardiometabolic disease at year five, separate models for each definitions of surgical treatment failure. Adjusted for sex and baseline; age, BMI and corresponding cardiometabolic disease.**

|                                      | Beta  | Standard error | Odds ratio | 95% Confidence interval |       | p      |
|--------------------------------------|-------|----------------|------------|-------------------------|-------|--------|
|                                      |       |                |            | Lower                   | Upper |        |
| <b>Type 2 diabetes</b>               |       |                |            |                         |       |        |
| Non surgical treatment failure (ref) |       |                |            |                         |       |        |
| Total weight loss <20%               | 0.818 | 0.142          | 2.266      | 1.715                   | 2.995 | <0.001 |
| Excess BMI loss <50%                 | 0.760 | 0.144          | 2.138      | 1.611                   | 2.837 | <0.001 |
| BMI >35 or >40*                      | 0.893 | 0.184          | 2.441      | 1.703                   | 3.499 | <0.001 |
| Compiled**                           | 0.743 | 0.137          | 2.102      | 1.608                   | 2.749 | <0.001 |
| <b>Dyslipidemia</b>                  |       |                |            |                         |       |        |
| Non surgical treatment failure (ref) |       |                |            |                         |       |        |
| Total weight loss <20%               | 0.946 | 0.084          | 2.574      | 2.185                   | 3.033 | <0.001 |
| Excess BMI loss <50%                 | 0.935 | 0.083          | 2.548      | 2.164                   | 3.000 | <0.001 |
| BMI >35 or >40*                      | 0.863 | 0.100          | 2.370      | 1.949                   | 2.883 | <0.001 |
| Compiled**                           | 0.916 | 0.079          | 2.500      | 2.143                   | 2.918 | <0.001 |
| <b>Hypertension</b>                  |       |                |            |                         |       |        |
| Non surgical treatment failure (ref) |       |                |            |                         |       |        |
| Total weight loss <20%               | 0.687 | 0.098          | 1.988      | 1.642                   | 2.407 | <0.001 |
| Excess BMI loss <50%                 | 0.652 | 0.095          | 1.920      | 1.593                   | 2.315 | <0.001 |
| BMI >35 or >40*                      | 0.569 | 0.114          | 1.767      | 1.413                   | 2.210 | <0.001 |
| Compiled**                           | 0.616 | 0.089          | 1.851      | 1.554                   | 2.206 | <0.001 |

\*For subjects with presurgery BMI of <50 and >50, respectively.

\*\*Defined as meeting any of the definitions, <20%TWL | <50%EBMIL | BMI >35 or >40.

**eTable 6. Odds of Cardiometabolic disease at year five for subjects reaching one, two or three of the three definitions (exclusively, subjects may only be in one group). Adjusted for sex and baseline; age, BMI and corresponding cardiometabolic disease.**

|                                      | Beta  | Standard error | Odds ratio | 95% Confidence Interval |       | p      |
|--------------------------------------|-------|----------------|------------|-------------------------|-------|--------|
|                                      |       |                |            | Lower                   | Upper |        |
| <b>Type 2 diabetes</b>               |       |                |            |                         |       |        |
| Non surgical treatment failure (ref) |       |                |            |                         |       |        |
| Surgical failure 1/3                 | 0.409 | 0.258          | 1.506      | 0.908                   | 2.496 | 0.113  |
| Surgical failure 2/3                 | 0.592 | 0.186          | 1.808      | 1.255                   | 2.606 | 0.001  |
| Surgical failure 3/3                 | 1.119 | 0.198          | 3.061      | 2.078                   | 4.509 | <0.001 |
| <b>Dyslipidemia</b>                  |       |                |            |                         |       |        |
| Non surgical treatment failure (ref) |       |                |            |                         |       |        |
| Surgical failure 1/3                 | 0.605 | 0.147          | 1.832      | 1.373                   | 2.445 | <0.001 |
| Surgical failure 2/3                 | 0.961 | 0.111          | 2.614      | 2.103                   | 3.250 | <0.001 |
| Surgical failure 3/3                 | 1.050 | 0.111          | 2.857      | 2.299                   | 3.550 | <0.001 |
| <b>Hypertension</b>                  |       |                |            |                         |       |        |
| Non surgical treatment failure (ref) |       |                |            |                         |       |        |
| Surgical failure 1/3                 | 0.415 | 0.165          | 1.515      | 1.097                   | 2.091 | 0.012  |
| Surgical failure 2/3                 | 0.556 | 0.130          | 1.744      | 1.352                   | 2.248 | <0.001 |
| Surgical failure 3/3                 | 0.798 | 0.129          | 2.221      | 1.724                   | 2.862 | <0.001 |
